# Supplementary material
Source: PubMed Central journal article supplement (PMC4476953)
Supplement: NIHMS694633-supplement-Supplementary_Tables.pdf [file NIHMS694633-supplement-Supplementary_Tables.pdf]

**Supplementary Table 1:** Top ten differentially regulated genes in the pancreatic cancer MUC4 expressing cell line (Capan1) compared to MUC4 non-expressing cell line (Panc1) as analyzed using chromatin modifying enzyme PCR array.

| <b>Gene Name</b>     | <b>Fold Change (Capan1/Panc1)<br/>Arbitrary Unit</b> |
|----------------------|------------------------------------------------------|
| <b>Upregulated</b>   |                                                      |
| PRMT6                | 15.59                                                |
| HDAC9                | 11041                                                |
| HDAC10               | 8.83                                                 |
| KDM4C                | 5.58                                                 |
| KDM6B                | 4.93                                                 |
| NCOA3                | 4.35                                                 |
| SETD1B               | 3.12                                                 |
| KAT2A                | 3.03                                                 |
| KDM1A                | 2.99                                                 |
| ESCO2                | 2.99                                                 |
| <b>Downregulated</b> |                                                      |
| PRMT8                | 0.02                                                 |
| AURKC                | 0.10                                                 |
| KAT2B                | 0.13                                                 |
| NCOA1                | 0.17                                                 |
| MLL5                 | 0.20                                                 |
| UBE2A                | 0.23                                                 |
| KDM5B                | 0.24                                                 |
| ATF2                 | 0.30                                                 |
| SMYD3                | 0.32                                                 |
| ESCO1                | 0.34                                                 |

**Supplementary Table 2:** The list of top ten differentially expressed genes and cytokines down regulated after NCOA3 KD.

| <b>Gene symbol</b>             | <b>p-value</b> | <b>Fold change (KD/Control)</b> |
|--------------------------------|----------------|---------------------------------|
| <b>Downregulated (Top ten)</b> |                |                                 |
| LOXL2                          | <0.0001        | 0.241                           |
| ADRB2                          | 0.0001         | 0.248                           |
| FERMT2                         | 0.0003         | 0.289                           |
| CAV1                           | 0.0001         | 0.296                           |
| ASAP1                          | 0.0001         | 0.346                           |
| STEAP4                         | 0.0003         | 0.348                           |
| LIFR                           | 0.0001         | 0.351                           |
| IL8                            | 0.0006         | 0.381                           |
| PRDM8                          | 0.0004         | 0.384                           |
| RASSF8                         | 0.0001         | 0.406                           |
| <b>Upregulated (Top ten)</b>   |                |                                 |
| TRIM13                         | 0.005          | 4.350                           |
| CLRN3                          | 0.0005         | 3.757                           |
| WBP1L                          | 0.004          | 3.149                           |
| CDH17                          | 0.0001         | 2.978                           |
| ALDH3A1                        | 0.005          | 2.919                           |
| CCT7                           | 0.004          | 2.733                           |
| FUS                            | 0.002          | 2.676                           |
| PRR13                          | 0.0003         | 2.650                           |
| CCT2                           | 0.002          | 2.605                           |
| CLDN18                         | 0.003          | 2.595                           |
| <b>Cytokines</b>               |                |                                 |
| CXCL1                          | 0.0002         | 0.428                           |
| CXCL5                          | 0.0004         | 0.576                           |
| CCL20                          | 0.0038         | 0.577                           |
| CXCL2                          | 0.0006         | 0.591                           |
| <b>Miscellaneous</b>           |                |                                 |
| FUT 8                          | 0.0004         | 0.493                           |

| Gene Name | Primer sequence |                                  |
|-----------|-----------------|----------------------------------|
| NCOA3     | For             | 5'-TGGTGCTGCGGTGATGAGGC-3'       |
|           | Rev             | 5'-TCTCTGCTGCGTTGGGCGAC-3'       |
| IL8       | For             | 5'- GAGTGGACCACACTGCGCCAA-3'     |
|           | Rev             | 5'- TCCACAACCCTCTGCACCCAGTT-3'   |
| FUT8      | For             | 5'- AATACTTGATCCGCCACAG-3'       |
|           | Rev             | 5'- TCAATGGGATGGAAGGCAG-3'       |
| PRMT8     | For             | 5'-CTCCCGCTGCCTGCTCCTGA-3'       |
|           | Rev             | 5'-ATGGACGCATTGCACGGGCT-3'       |
| HDAC9     | For             | 5'-AGAACTTGACACGGCAGCACCA-3'     |
|           | Rev             | 5'AGGAGTTCTTGTTGCTGTTTTATGGCT-3' |
| KDM5B     | For             | 5'-TGCCCAATGGTGCGGCTCTG-3'       |
|           | Rev             | 5'-CGGGGATAGATCGGCCTCGTGT-3'     |
| CLRN3     | For             | 5'-ACACCTGGAACGGGCTCGGTG-3       |
|           | Rev             | 5'-AGTTGGTTGGACTGCGTGTTTCGC-3'   |
| CDH17     | For             | 5'-CCGGGGGAGATACTCCAGTCGT-3'     |
|           | Rev             | 5'-ACACAGGGAGTGAAGATGGGCC-3'     |
| MYO1A     | For             | 5'-CCGGTCAGAGGCTGCCCTCA-3'       |
|           | Rev             | 5'-CACTTGTAGGGGGCGGCTGG-3'       |
| LOXL2     | For             | 5'-CCTCTGCTCGAGAAAGGGGCTC-3'     |
|           | Rev             | 5'-GAGGGACAGGCGGGGTACAGAAG-3'    |
| PRMT6     | For             | 5'-TCCTGCCGGGACCAGTGGAG-3'       |
|           | Rev             | 5'-TTGGTTCGCGCGTGGAGGAC-3'       |
| AURKC     | For             | 5'-CAGCCACGGCTGCTCACGAC-3'       |

**Supplementary Table 3:**  
Human gene specific primer sequences.

|      |     |                                |
|------|-----|--------------------------------|
|      | Rev | 5'-GCTGTTTGGTTTGCTGTAGCCACT-3' |
| MUC4 | For | 5'-AGGCGTTCTTATACCACGTTC-3'    |
|      | Rev | 5'-TGTAGCCATCGCATCTGAAG-3'     |
| MUC1 | For | 5'-ACTTCTGCCAACTTGTAGGG-3'     |
|      | Rev | 5'-TGAGAAGTGTCCGAGAAATTGG-3'   |

**Supplementary Table 4:** Mouse gene specific primer sequences.

| Gene Name   | Primer sequence |                                 |
|-------------|-----------------|---------------------------------|
| Mouse Muc4  | For             | 5'-GAGGGCTACTGTCACAATGGAGGC-3'  |
|             | Rev             | 5'-AGGGTTCCGAAGAGGATCCCGTAG-3'  |
| Mouse Muc1  | For             | 5'-CCCTACCTACCACACTCACGGACG-3'  |
|             | Rev             | 5'-GTGGTCACCACAGCTGGGTTGGTA-3'  |
| Mouse Ncoa3 | For             | 5'- AAGTACTGGCGTCACCCTTTGCC-3'  |
|             | Rev             | 5'- TGTGTCCACAGAAGCACTGCTCGC-3' |

**Supplementary Table 5:** Primer pairs used for chromatin immune-precipitation and micrococcal nuclease assay.

| Primer pair                                            | Primer sequence |                                     |
|--------------------------------------------------------|-----------------|-------------------------------------|
| <b>Primers used for Chromatin Immuno-precipitation</b> |                 |                                     |
| Primer (H3me3K4)                                       | For             | 5'- CTCATTCACCCCATTCTGTCCCCATC-3'   |
|                                                        | Rev             | 5'- GCTCCCCTCAATATGCCCATTTTCC-3'    |
| Primer (NCOA3)                                         | For             | 5'-GCGCTTTGTA CTTCACAGGGCCATG-3'    |
|                                                        | Rev             | 5'-CTTGT CAGACTTAGGACA ACTAGGCTG-3' |
| Control Primer                                         | For             | 5'-CACCCACCCATGCTAGTCTT-3'          |
|                                                        | Rev             | 5'- ACCCTCAA ACTCCTGGTCCT-3'        |
| <b>Primers used for Micrococcal Nuclease Assay</b>     |                 |                                     |
| Primer Pair I                                          | For             | 5'-CTCATT CACCCCATTCTGTCCCCATC-3'   |
|                                                        | Rev             | 5'-CAAGGAGTAGGCAACCGACGCTG-3'       |
| Primer Pair II                                         | For             | 5' GCGCTTTGTA CTTCACAGGGCCATG-3'    |
|                                                        | Rev             | 5'-GCTCCCCTCAATATGCCCATTTTCC-3'     |
